# Supplementary material for: Modeling the impact of prioritizing first or second vaccine doses during the 2022 mpox outbreak
Source: bioRxiv or medRxiv preprint supplement (doi:10.1101/2023.10.13.23297005), 2024-01-26
Supplement: Supplementary file [file media-1.pdf]

1 **Supplementary Information for “Modeling the impact of prioritizing first or second**  
2 **vaccine doses during the 2022 mpox outbreak”**

3 **S.1: Network parameters**

4 Parameters for dynamic network were taken from a nationally distributed survey of sexual  
5 behaviors among MSM from 2017-2019 [5]. We recognize that sexual networks among MSM  
6 may have been impacted by Covid-19, but extensive egocentric surveys of sexual behavior  
7 among MSM taken after Covid-19 restrictions were implemented and relaxed have not been  
8 published. Thus, the ARTnet survey represents the most up to date and thorough source of sexual  
9 behavior data among MSM. Where necessary, ARTnet data was supplemented by prior surveys  
10 of sexual behavior among MSM in Atlanta [23] (Table S1).

11 ARTnet reports the proportion of MSM who have between 0 and 2 ‘Main’ partners and  
12 between 0 and 3 ‘Casual’ partners. Individuals with 2 ‘Main’ partners represent a tiny portion of  
13 the population (e.g. individuals with 2 ‘Main’ partners and 3 ‘Casual’ partners make up 0.14% of  
14 the population). Modeling the behavior of tiny fractions of the population can lead to instability  
15 when fitting dynamic network models, so we removed individuals with 2 main partners from the  
16 model for this analysis (Table S1).

17 We extracted probabilities per day of engaging in one-time sexual partnerships from  
18 supplemental Figure 1 from [5], by taking the average mean of one-time daily partnership  
19 probabilities across percentages of the population corresponding to our sexual activity groups.

20 Table S1: Network parameters.

| <b>Parameter Description</b> | <b>Value</b> | <b>Source</b> |
|------------------------------|--------------|---------------|
|------------------------------|--------------|---------------|

| Sexual Network Parameters                                |            |                                                                                                                                                                                     |
|----------------------------------------------------------|------------|-------------------------------------------------------------------------------------------------------------------------------------------------------------------------------------|
| Proportion individuals with 0 main and 0 casual partners | 0.30       | Weiss KM, Goodreau SM, Morris M, et al. Egocentric sexual networks of men who have sex with men in the United States: Results from the ARTnet study. <i>Epidemics</i> . <b>2020</b> |
| Proportion individuals with 0 main and 1 casual partners | 0.15       |                                                                                                                                                                                     |
| Proportion individuals with 0 main and 2 casual partners | 0.067      |                                                                                                                                                                                     |
| Proportion individuals with 0 main and 3 casual partners | 0.070      |                                                                                                                                                                                     |
| Proportion individuals with 1 main and 0 casual partners | 0.30       |                                                                                                                                                                                     |
| Proportion individuals with 1 main and 1 casual partners | 0.056      |                                                                                                                                                                                     |
| Proportion individuals with 1 main and 2 casual partners | 0.028      |                                                                                                                                                                                     |
| Proportion individuals with 1 main and 3 casual partners | 0.027      |                                                                                                                                                                                     |
| Mean duration of Main partnerships                       | 1,900 days |                                                                                                                                                                                     |
| Mean duration of Casual partnerships                     | 930 days   |                                                                                                                                                                                     |
| Probability per day of individual in activity group 1    | 0          |                                                                                                                                                                                     |

|                                                                                        |        |  |
|----------------------------------------------------------------------------------------|--------|--|
| having a one-time sexual contact                                                       |        |  |
| Probability per day of individual in activity group 2 having a one-time sexual contact | 0.0012 |  |
| Probability per day of individual in activity group 3 having a one-time sexual contact | 0.0052 |  |
| Probability per day of individual in activity group 4 having a one-time sexual contact | 0.016  |  |
| Probability per day of individual in activity group 5 having a one-time sexual contact | 0.064  |  |
| Probability per day of individual in activity group 6 having a one-time sexual contact | 0.30   |  |

|                                                                     |       |                                                                                                                                                                                                                               |
|---------------------------------------------------------------------|-------|-------------------------------------------------------------------------------------------------------------------------------------------------------------------------------------------------------------------------------|
| Proportion of the population in activity groups 1-5 each            | 0.19  | Jenness SM, Weiss KM, Goodreau SM, et al. Incidence of Gonorrhea and Chlamydia Following Human Immunodeficiency Virus Preexposure Prophylaxis Among Men Who Have Sex With Men: A Modeling Study. Clin Infect Dis. <b>2017</b> |
| Proportion of the population in activity group 6                    | 0.05  |                                                                                                                                                                                                                               |
| Mean difference between square roots of ages of Main partners       | 0.464 |                                                                                                                                                                                                                               |
| Mean difference between square roots of ages of Main partners       | 0.586 |                                                                                                                                                                                                                               |
| Mean difference between square roots of ages of Main partners       | 0.544 |                                                                                                                                                                                                                               |
| Proportion of population who are exclusively insertive              | 0.242 |                                                                                                                                                                                                                               |
| Proportion of population who are exclusively receptive              | 0.321 |                                                                                                                                                                                                                               |
| Proportion of population who are versatile                          | 0.437 |                                                                                                                                                                                                                               |
| Probability of having sexual contact per timestep with Main partner | 0.22  |                                                                                                                                                                                                                               |

|                                                                         |      |  |
|-------------------------------------------------------------------------|------|--|
| Probability of having sexual contact per timestep with Casual partner   | 0.14 |  |
| Probability of having sexual contact per timestep with one-time partner | 1    |  |

21

22 **S.2: Calculating time between first and second dose administration when doses are pre-**  
 23 **allocated**

24 Individuals receiving a full course of the JYNNEOS® vaccine are currently  
 25 recommended to wait 4 weeks between doses. However, logistical issues often prevent patients  
 26 from completing the two doses exactly 4 weeks apart, even when doses are available. Thus, for  
 27 our ‘second-dose priority’ scenario, where doses were pre-allocated for individuals, we estimated  
 28 the mean time that would pass between first and second doses in a pre-allocation scenario.

29 While NYC employed a ‘first-dose priority’ strategy, CDC guidance at the beginning of  
 30 the mpox outbreak recommended that all individuals complete a full course of JYNNEOS at the  
 31 recommended schedule. Thus, it is reasonable to assume that many jurisdictions pre-allocated a  
 32 full 2-dose course to individuals. To parameterize time between doses in our ‘second-dose  
 33 priority’, we measured the average time between doses in California, Washington D.C., and  
 34 Illinois: three jurisdictions with large early mpox outbreaks.

35 We measured time between doses by fitting the transformed number of cumulative first  
 36 doses administered over time to the number of cumulative second doses over time in each of

37 these jurisdictions. We first multiplied the cumulative number of first doses administered over  
38 time by the percent of individuals receiving a first dose who eventually received a second dose in  
39 each jurisdiction. We treat the resulting data as the cumulative number of first doses  
40 administered to individuals who would eventually receive their second dose. We then shifted the  
41 cumulative number of first doses administered forward in time  $x = [1, 2 \dots 10]$  weeks. We  
42 calculate the sum of square differences between the first and second dose curves after shifting  
43 the first dose forward by  $x = [1, 2 \dots 10]$ . We treat the value of  $x$  that results in the smallest sum  
44 of square differences as a proxy for mean time between first and second vaccine doses (Figure  
45 S1).

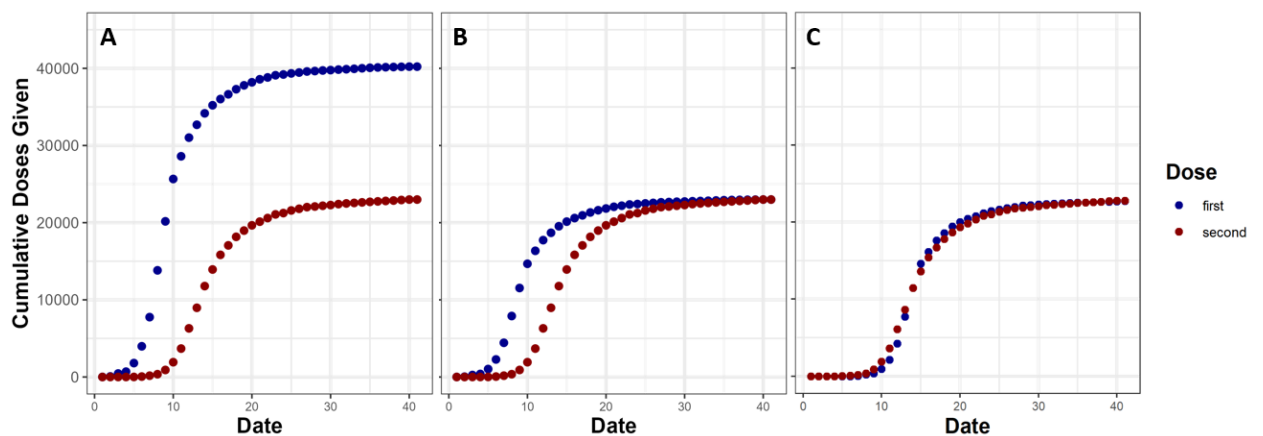

46

47 **Figure S1:** Visualization of method for estimating average time between first and second dose  
48 recipients. In panel A, we show simulated cumulative first and second dose administration. In  
49 panel B, we multiply cumulative first doses by the proportion of individuals who go on to get  
50 second doses. In panel C, we shift the cumulative first dose curve forward by 5 weeks,  
51 minimizing sum of squared differences between the curves.

52

53 We estimate that on average 5 weeks passed between first and second vaccine dose  
54 administration for California, Illinois, and Washington D.C. We thus delay second dose  
55 vaccination by 5 weeks in our ‘second-dose priority’ scenario.

56 We note that our ‘second-dose priority’ scenario will overestimate the potential benefit of  
57 pre-allocating doses, because we do not account for individuals being pre-allocated doses and  
58 then being unable or unwilling to show up for their second dose.

### 59 **S.3: Calculating per-exposure vaccine efficacy**

60 Here, we calculate the per-exposure reduction in transmission probability due to  
61 vaccination, or per-exposure vaccine efficacy. The vaccine effectiveness (the percent reduction  
62 in infected individuals in the vaccinated vs. control arm of the trial,  $E$ ), can be calculated as

$$63 \quad E = 1 - \frac{1 - (1 - \mu(1 - \delta))^c}{1 - (1 - \mu)^c}$$

64 Via the probability of transmission per mpox exposure ( $\mu$ ), the underlying per-exposure vaccine  
65 efficacy ( $\delta$ ), and the number of infected individuals that people in an effectiveness trial contacted  
66 during the trial, filtering out those who had no exposures ( $c$ ).

67 Thus, given a reported vaccine effectiveness, the per-exposure vaccine efficacy is given by

$$68 \quad \delta = 1 - \frac{1 - (1 - (1 - E)(1 - (1 - \mu)^c))^{\frac{1}{c}}}{\mu}$$

69 If  $c = 1$ , then  $\delta = E$ . However, if  $c > 1$  then  $\delta > E$  (Figure S2).

70 For the purposes of this study, we assume that individuals in the JYNNEOS® effectiveness  
71 study [11] were exposed to mpox no more than once. However, it is likely that some individuals

72 in the effectiveness study were exposed multiple times, and thus we underestimate per-exposure  
73 vaccine efficacy. Thus, we reran our analysis using higher vaccine efficacy estimates (S.5).

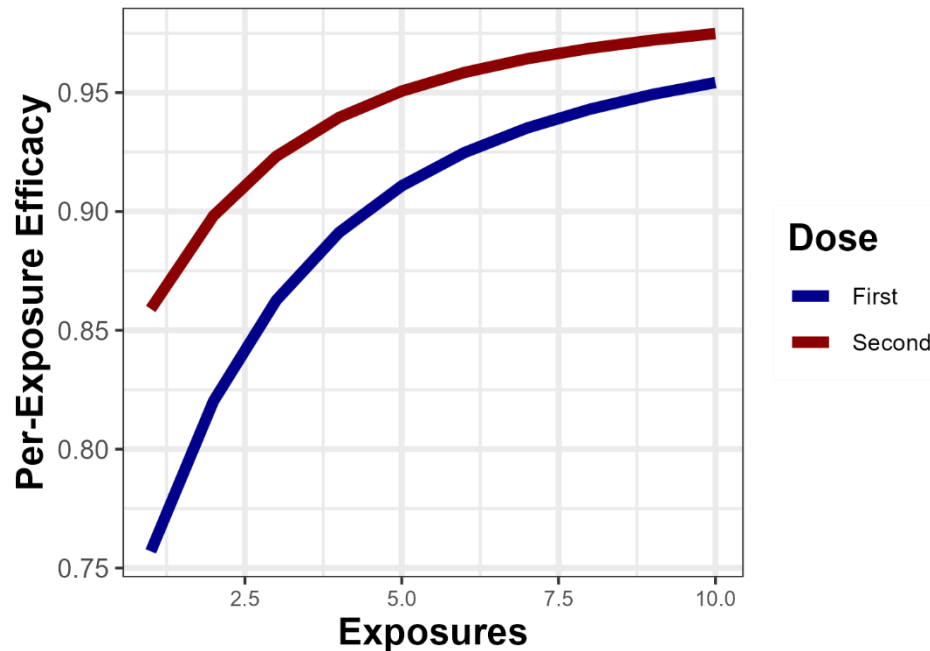

74

75 **Figure S2:** Here we show the derived per-exposure reductions in transmission probability due to  
76 one or two vaccine doses on the Y-axis, vs the number of assumed mpox exposures for vaccine  
77 effectiveness trial participants on the x-axis.

#### 78 **S.4: Posterior distributions of fit model parameters**

79 Our fitting procedure drew 100 posterior parameter sets from our 1000 prior parameter  
80 sets, with the likelihood of a set being drawn being based on the negative binomial likelihood of  
81 the corresponding model output generating observed daily incident cases. We sampled with  
82 replacement, and thus our posterior distribution consists of 75 unique parameter sets.

83 In our prior parameter sets, all parameters were drawn from a uniform distribution, and  
84 parameters were not correlated with one another across sets. In our posterior distribution, we find



85 that across parameter sets, per-exposure transmission probabilities are significantly negatively  
 86 correlated with the number of individuals infected via extra-network contacts during the ‘surge  
 87 period’ (‘surge exposures’) (Figure S3). We also find that maximum behavioral adaptation is  
 88 positively correlated with ‘surge exposures’. This indicates that parameter sets with disparate  
 89 parameter combinations can generate similar epidemic curves. E.g., a parameter set with low  
 90 per-exposure transmission probability and a high number of ‘surge exposures’ could generate a  
 91 similar epidemic curve as a parameter set with a high per-exposure transmission probability and  
 92 a low number of ‘surge exposures’. This means that this analysis should not be used to infer the  
 93 value of any one of these parameters individually.

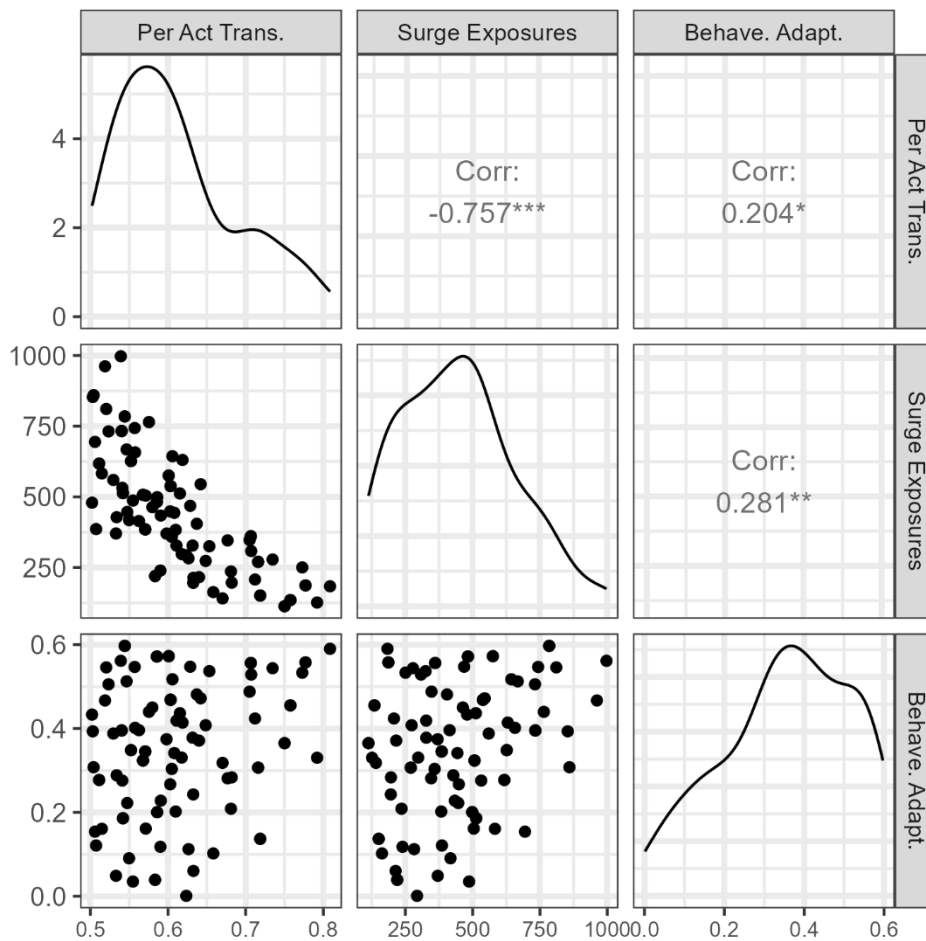

95 **Figure S3:** Here we show posterior distributions of the parameters in our model that were fit to  
96 incident case data, and correlations between those parameters. ‘Per Act Trans.’ indicates the  
97 probability of mokeypox virus transmission per contact between a susceptible and an infectious  
98 individual. ‘Surge Exposures’ indicates the number of individuals infected via extra-network  
99 contacts during the ‘surge period’ from June 26 - July 10. ‘Behave. Adapt.’ indicates behavioral  
100 adaptation, or the maximum percent reduction in one-time and casual sexual contacts due to the  
101 perceived risk of mpox. Panels show scatterplots of parameters across posterior parameter sets  
102 (bottom left panels), the posterior distribution of fit parameters (top-left to bottom-right), and  
103 correlations between parameters across posterior parameter sets (top-right panels).

104

#### 105 **S.5: Sensitivity analysis of higher per-exposure vaccine efficacy**

106 Here, we redo analysis with higher per-exposure vaccine efficacy estimates (85% for first dose  
107 and 95% for second dose) to reflect uncertainty in translating vaccine effectiveness to per-  
108 exposure vaccine efficacy. We find that when running our analysis with these higher per-  
109 exposure vaccine efficacy values, The strategies do not dependably differ from one another in  
110 terms of cases averted (Figure S6).

111

112

113

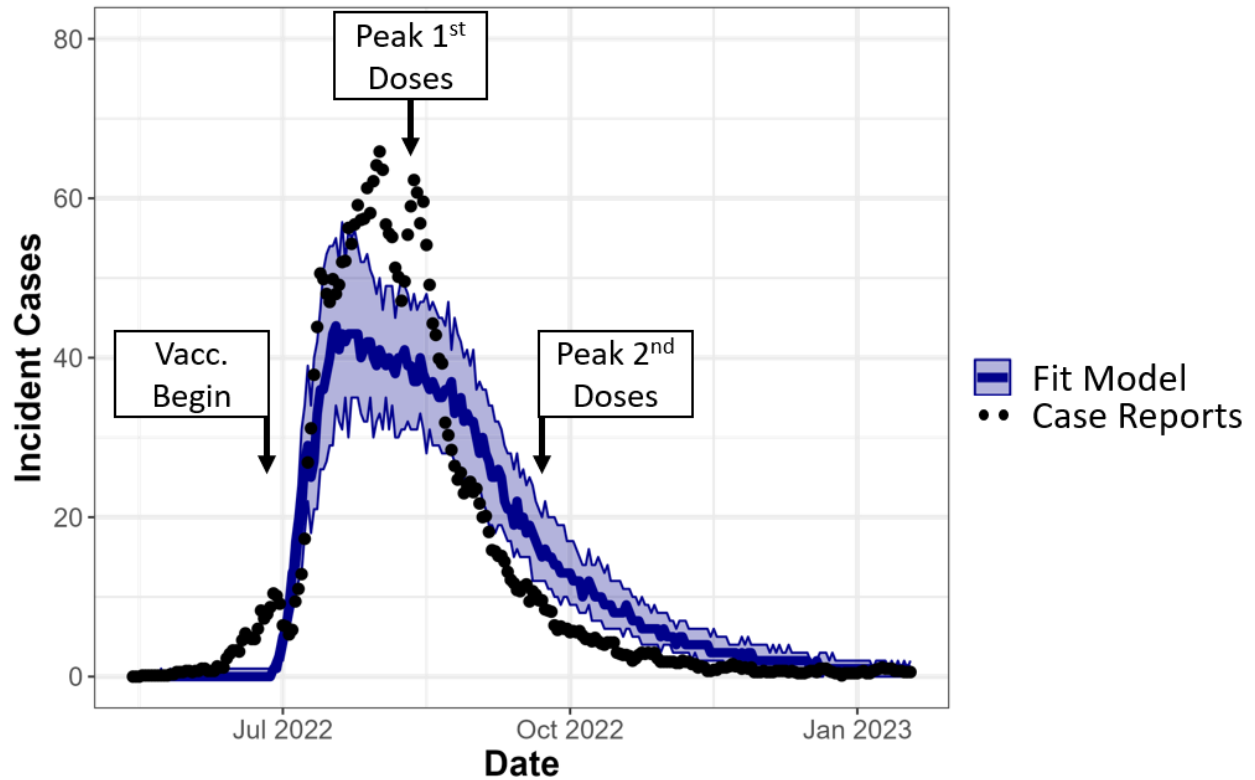

115

116 **Figure S4:** Repeat of Figure 2 with increased vaccine efficacy estimates. Mpxv model fit to data.

117 Dots indicate the 1 week running mean of incident daily cases in NYC, used as our fitting target.

118 Blue line represents median incident daily cases of model runs from the 100 parameter sets

119 selected in our fitting procedure, with band representing interquartile range of model runs,

120 assuming a 'first-dose priority' strategy. Labels indicate the beginning of pre-exposure

121 vaccination on June 26<sup>th</sup>, peak administration of first doses, occurring the week of August 7<sup>th</sup>,

122 and peak administration of second doses, occurring the week of September 18<sup>th</sup>.

123

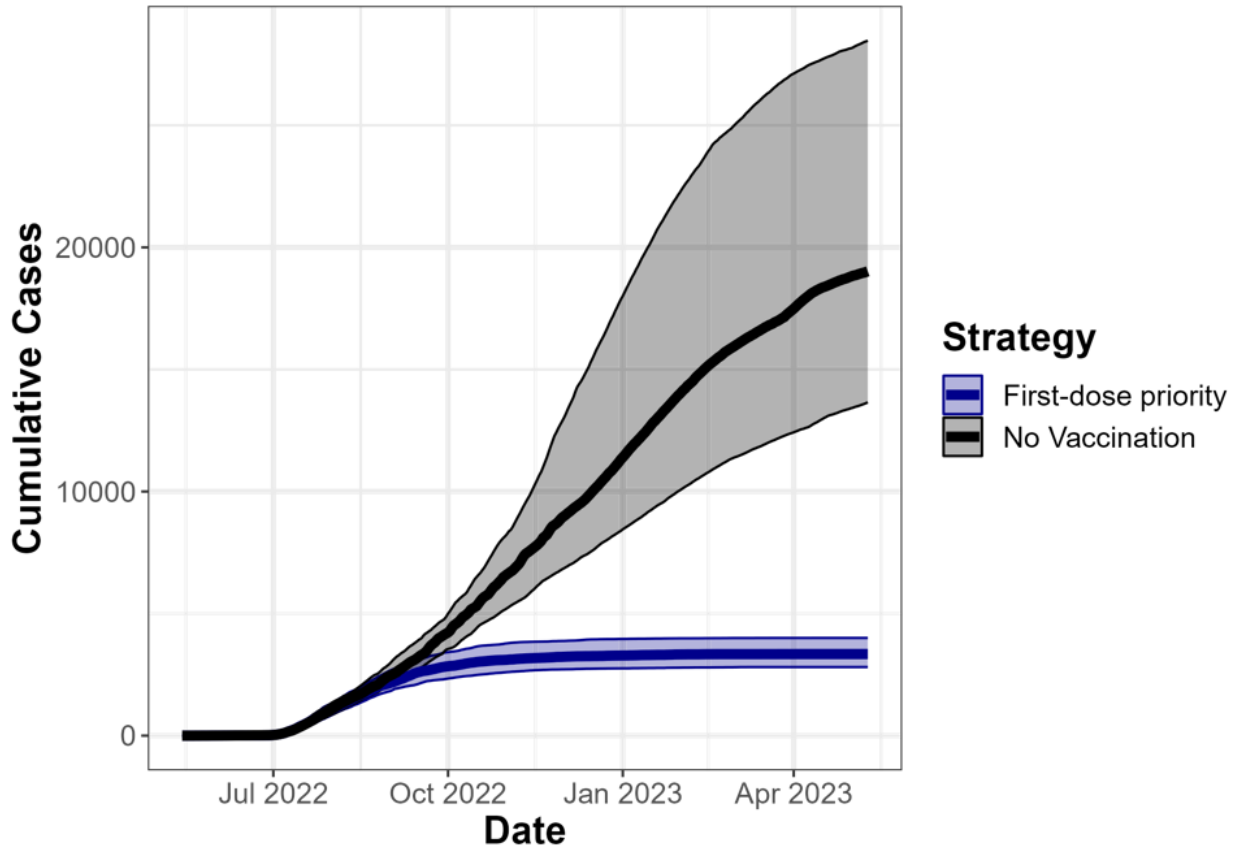

124

125 **Figure S5:** Repeat of Figure 3 with increased vaccine efficacy estimates. Estimated cumulative  
 126 cases over a year under the ‘first-dose priority’ strategy employed by NYC compared to a ‘no  
 127 vaccination’ scenario. Lines represent median cumulative cases of model runs from the 100  
 128 parameter sets selected in our fitting procedure, with bands representing interquartile ranges of  
 129 model runs.

130

131

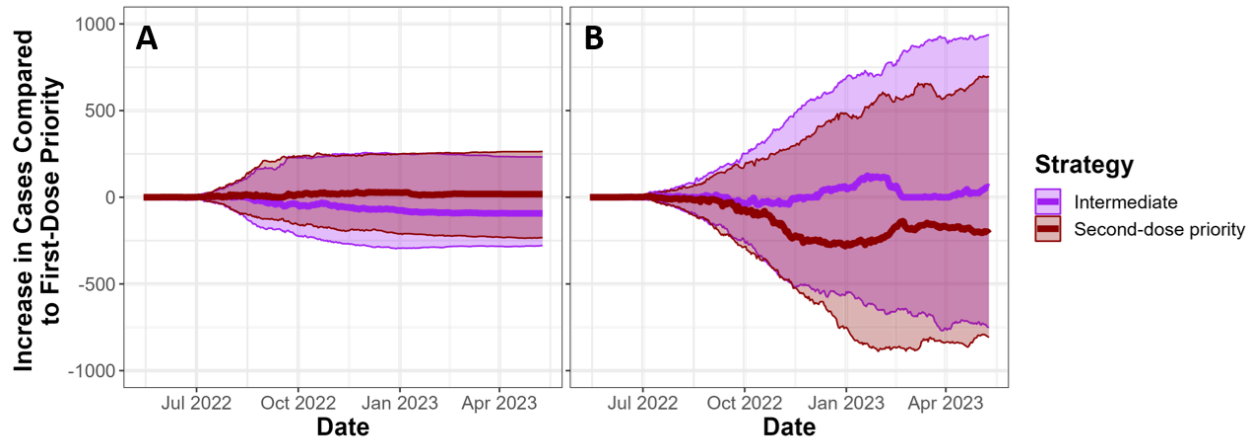

132

133 **Figure S6:** Repeat of Figure 4 with increased vaccine efficacy estimates. Comparison of  
134 different vaccine administration strategies\*. We show the difference in cases under the  
135 ‘intermediate’ or ‘second-dose priority’ strategy compared to the ‘first-dose priority’ strategy on  
136 the Y-axis, over time on the X-axis. Solid lines indicate median values across fit parameter sets,  
137 and transparent bands indicate interquartile ranges across parameter sets. Panel A uses vaccine  
138 administration numbers shown in Figure 1, while panel B cuts doses given by 75% to emulate  
139 jurisdictions with lower dose availability. All interquartile values overlap 0 at the end of this  
140 timeseries, indicating that strategies do not dependably differ from one another in terms of cases  
141 averted.

142 \*First-dose priority: first and second doses in model are based on first and second doses administered by  
143 NYC. Intermediate: Individuals who are eligible for a second dose receive priority for available doses, but  
144 there is no preallocation. Second-dose priority: doses are preallocated to ensure that all individuals  
145 receive full course of the vaccine.
